# Supplementary material for: Strong Selection Significantly Increases Epistatic Interactions in the Long-Term Evolution of a Protein
Source: PubMed Central journal article supplement (PMC4814079; doi:10.1371/journal.pgen.1005960), 2016-03-30

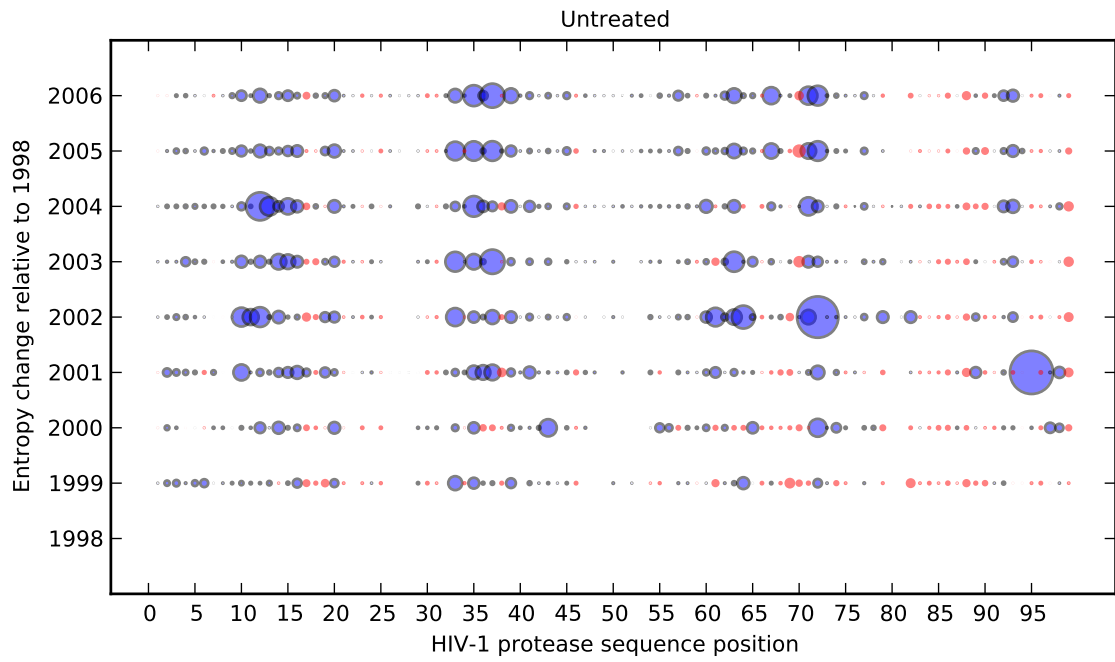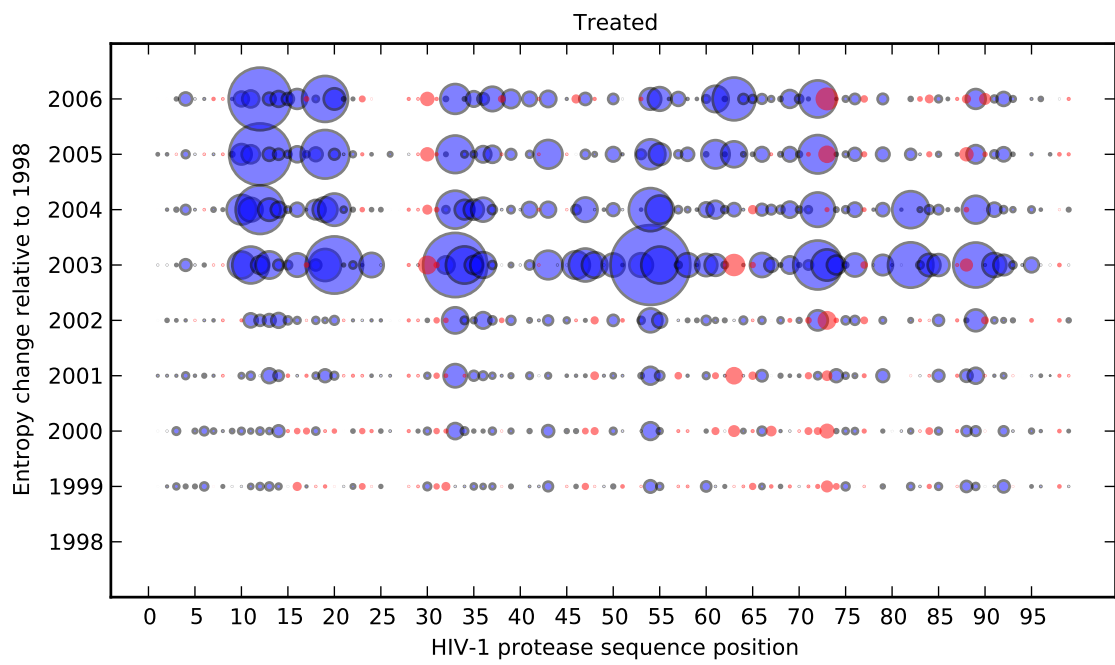

Supplement: pgen.1005960.s001.pdf [file pgen.1005960.s001.pdf]
