# Supplementary material for: Strong Selection Significantly Increases Epistatic Interactions in the Long-Term Evolution of a Protein
Source: PubMed Central journal article supplement (PMC4814079; doi:10.1371/journal.pgen.1005960), 2016-03-30
Supplement: pgen.1005960.s003.pdf [file pgen.1005960.s003.pdf]

**Supporting Table S1. Protease Inhibitors (PIs) and the years they were approved by FDA.** New drugs with higher genetic barriers to resistance are continually developed to provide treatment options to patients showing resistance to earlier drugs.

| Drug (PI)     | Year | Comment                                                                                                                                        |
|---------------|------|------------------------------------------------------------------------------------------------------------------------------------------------|
| Saquinavir    | 1996 | 1st-line PI, given with Ritonavir                                                                                                              |
| Indinavir     | 1996 | 1st-line PI. Metabolized quickly, requiring multiple doses per day to avoid drug resistance                                                    |
| Ritonavir     | 1996 | Initially used as a 1st-line PI, now used in combination with other PIs due to its ability to metabolize the enzyme that metabolizes other PIs |
| Nelfinavir    | 1997 | 1st-line PI                                                                                                                                    |
| Amprenavir    | 1999 | Discontinued in 2004, prodrug version still available (Fosamprenavir)                                                                          |
| Lopinavir     | 2000 | 2nd-line PI, given with Ritonavir in patients with some drug resistance                                                                        |
| Atazanavir    | 2003 | 2nd-line PI, given with Ritonavir in patients with some drug resistance                                                                        |
| Fosamprenavir | 2003 | Slow-release version of Amprenavir                                                                                                             |
| Tipranavir    | 2005 | 2nd-line PI, given with Ritonavir in patients with some drug resistance                                                                        |
| Darunavir     | 2006 | 2nd-line PI, given with Ritonavir in patients with some drug resistance                                                                        |
