# Supplementary material for: Strong Selection Significantly Increases Epistatic Interactions in the Long-Term Evolution of a Protein
Source: PubMed Central journal article supplement (PMC4814079; doi:10.1371/journal.pgen.1005960), 2016-03-30
Supplement: pgen.1005960.s004.pdf [file pgen.1005960.s004.pdf]

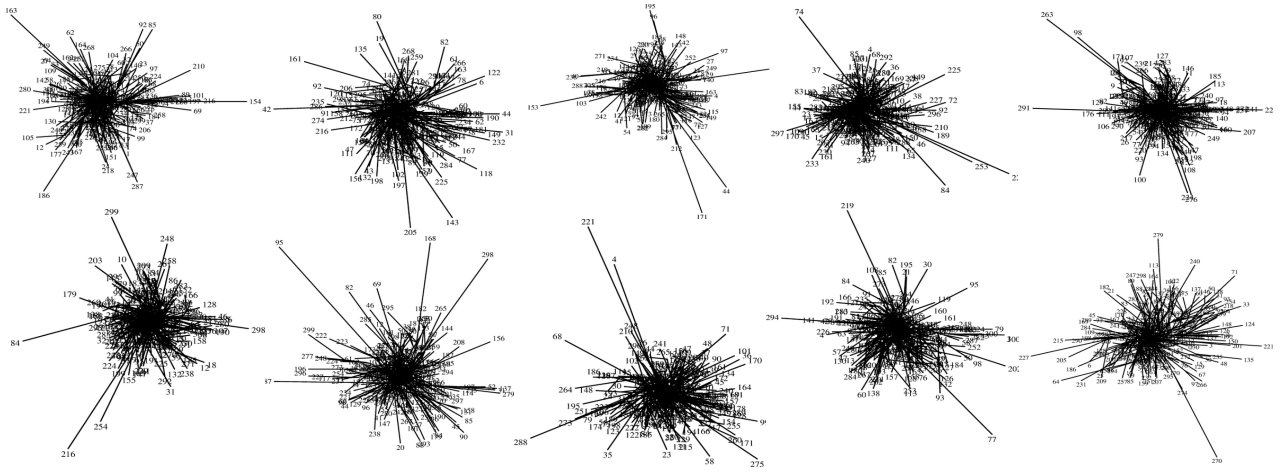

Phylogenies of subsampled datasets from year 2000 (untreated sequences)

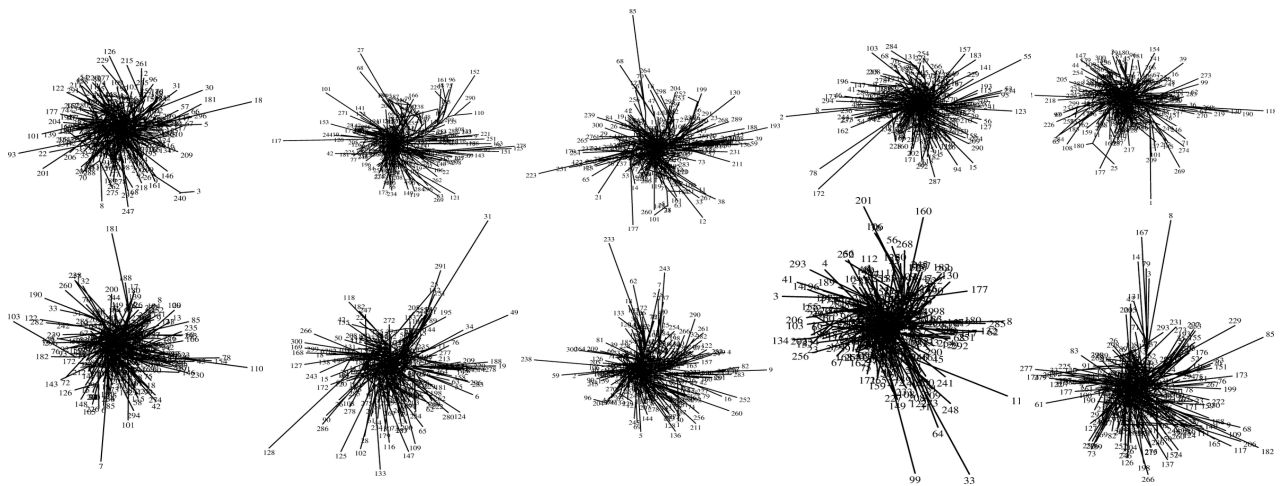

Phylogenies of subsampled datasets from year 2002 (untreated sequences)

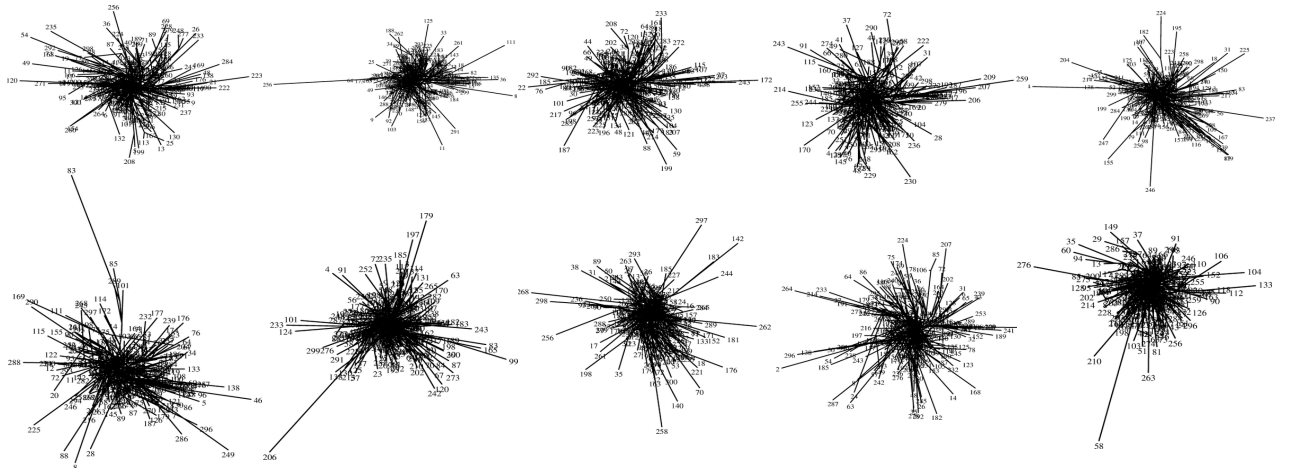

Phylogenies of subsampled datasets from year 2004 (untreated sequences)

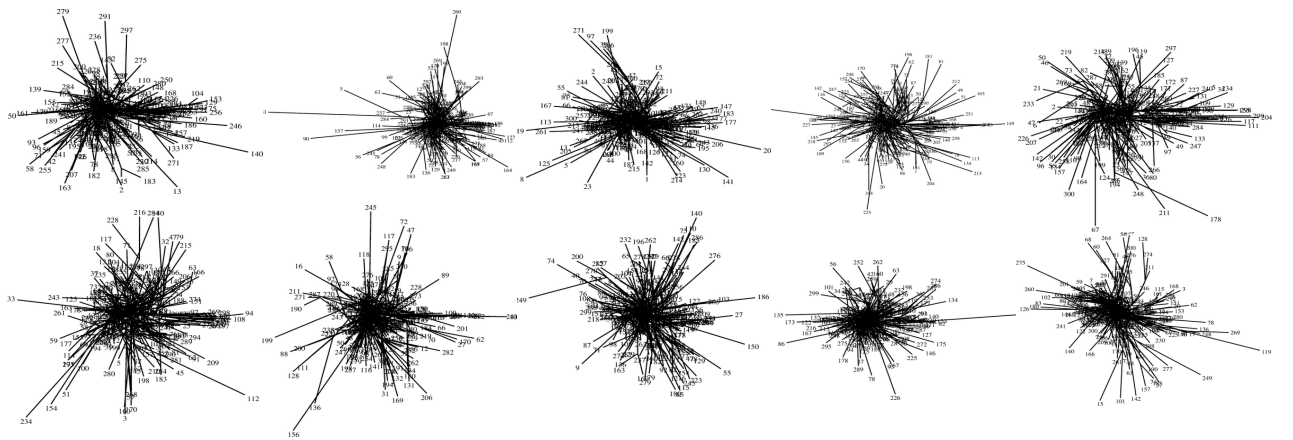

Phylogenies of subsampled datasets from year 2006 (untreated sequences)

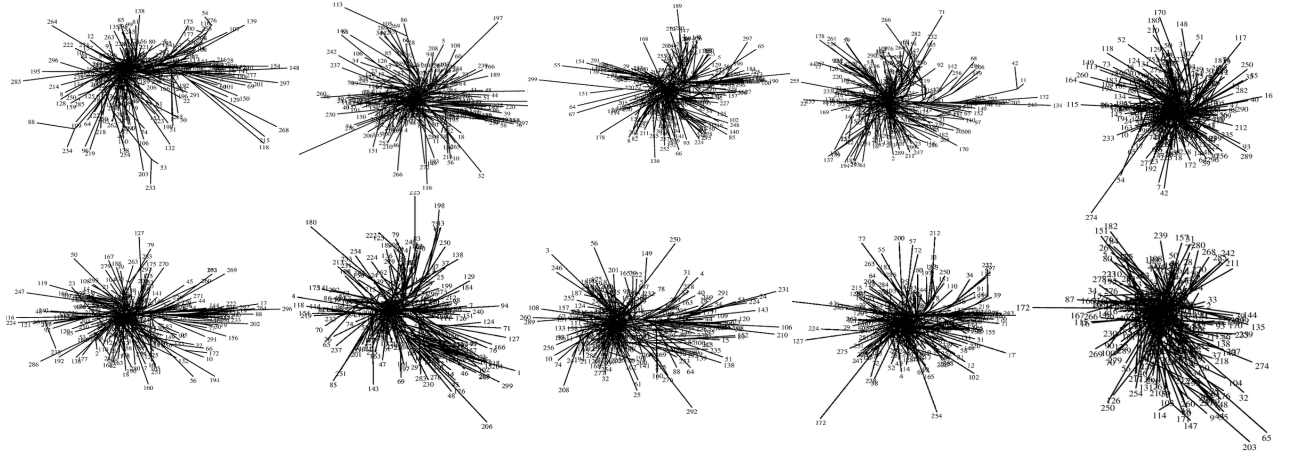

Phylogenies of subsampled datasets from year 1998 (treated sequences)

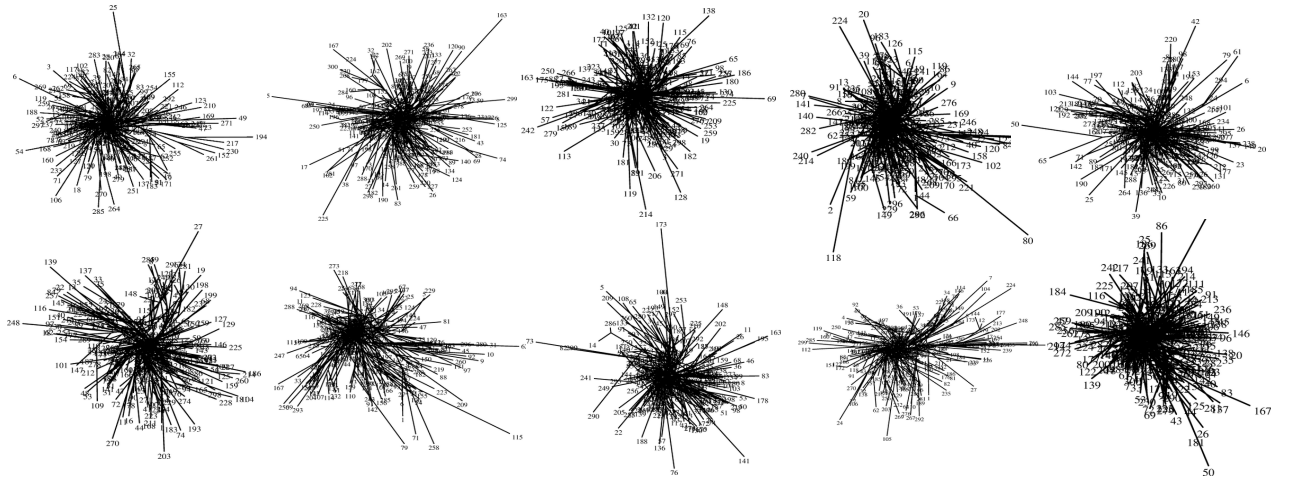

Phylogenies of subsampled datasets from year 2000 (treated sequences)

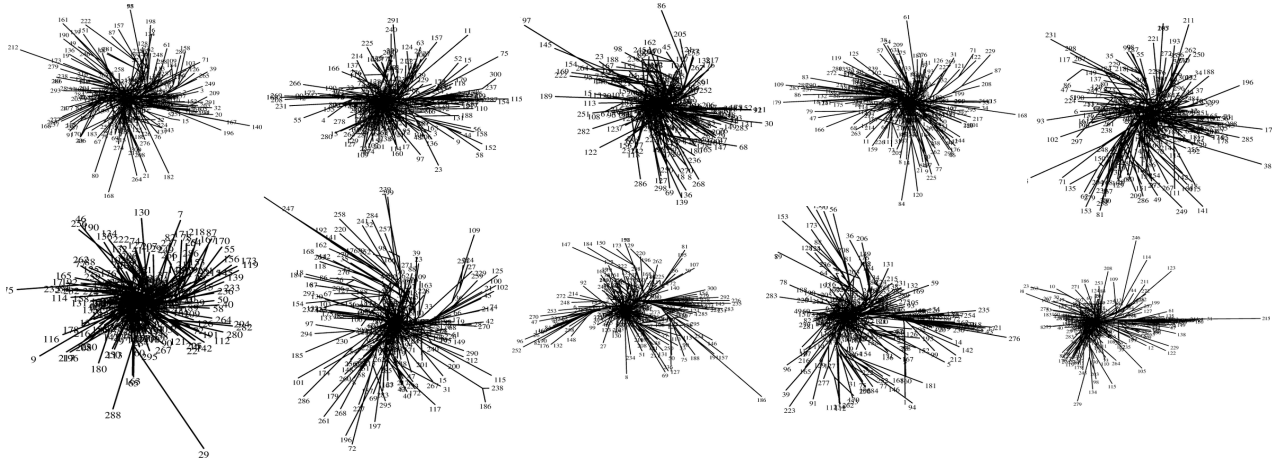

Phylogenies of subsampled datasets from year 2002 (treated sequences)

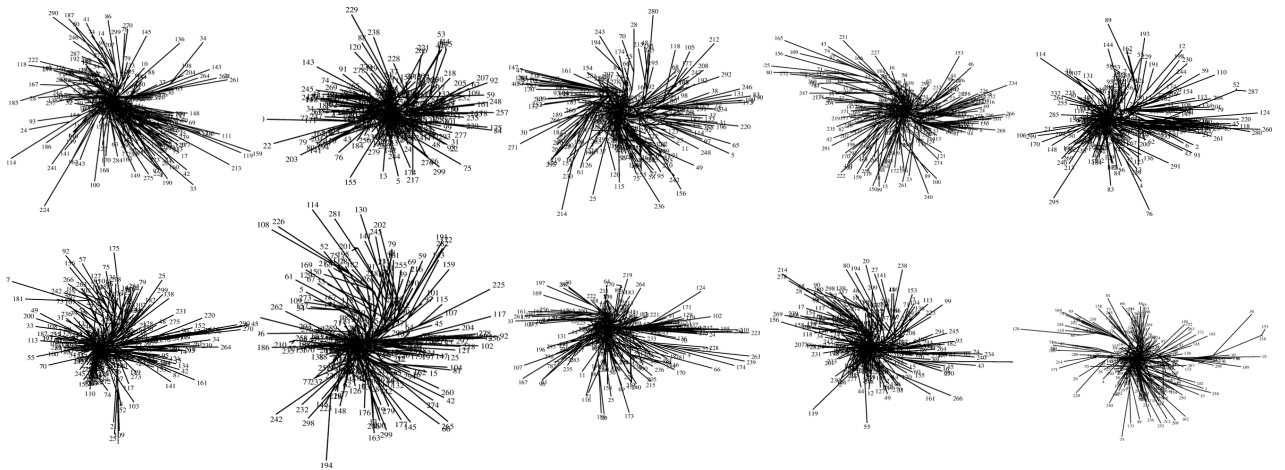

Phylogenies of subsampled datasets from year 2004 (treated sequences)

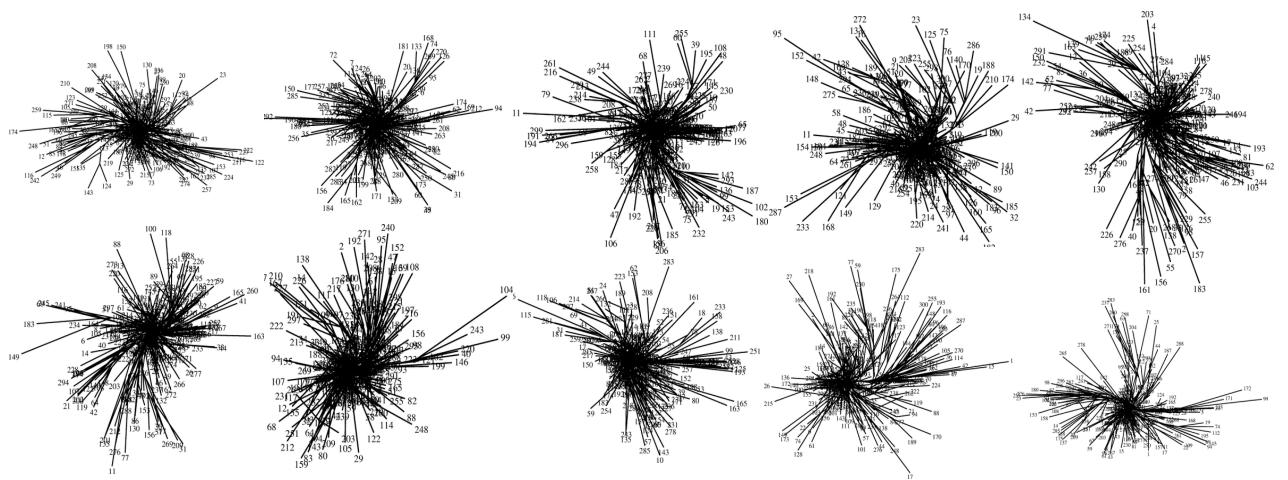

Phylogenies of subsampled datasets from year 2006 (treated sequences)

## References

- [1] Rhee SY, Gonzales MJ, Kantor R, Betts BJ, Ravela J, Shafer RW. Human immunodeficiency virus reverse transcriptase and protease sequence database. *Nucleic Acids Res.* 2003;31:298–303.
- [2] Shafer RW. Rationale and uses of a public HIV drug-resistance database. *J Infect Dis.* 2006;194 Suppl 1:S51–8.
- [3] Wang Q, Lee C. Distinguishing functional amino acid covariation from background linkage disequilibrium in HIV protease and reverse transcriptase. *PLoS One.* 2007;2:e814.
- [4] Lunzer M, Golding GB, Dean AM. Pervasive cryptic epistasis in molecular evolution. *PLoS Genet.* 2010;6:e1001162.
- [5] Felsenstein J. PHYLIP- Phylogeny Inference Package. *Cladistics.* 1989;5:164–166.
